# Supplementary material for: Phylogenetic Analysis of the MS4A and TMEM176 Gene Families
Source: PubMed Central journal article supplement (PMC2826416; doi:10.1371/journal.pone.0009369), 2010-02-23
Supplement: pone.0009369.s003.pdf [file pone.0009369.s003.pdf]

```

*      20      *      40      *      60      *      80      *      100      *      12
MM_10 : -----MAGQA : 5
HS_10 : -----MKAEA : 5
BT_10 : -----MAAANEASTVTA : 13
OA_10 : -----MANEDNC : 7
HS_18 : -----MAPKT--LFPSCPSIPLP-TMSKSQSSLSVNGSYLELTKFRHPPTHSSNAKHLPLQLYTMTE : 60
BT_18 : -----MMEQGVGANTVPGVTAPGNVYMIQARNPVAPGSRGQFVG-MATYLTSR-VTESDAGRANLQTP : 61
MM_18 : -----MSNQ---ENVSAVTVPSNVQVMQPTYAVVSGSHEQPLGKTTTYPASATMLQYNPNSANFNQP : 59
MD_8B : -----MTSNPEINNVFQVPPSTDSMV : 22
HS_8B : -----MNSMT : 5
BT_8B : -----MNPIT : 5
MM_8A : -----MEPEQERLTRQPGTVMNVT : 21
OA_8A : -----MT : 2
MM_13 : ----- : -
BT_13 : ----- : -
HS_13 : ----- : -
HS_12 : -----MSSKPTSHAEVNETIPNPY---PPGSFMAGFGQQLG : 35
MM_12 : -----MTSSQTTYPGTRG-IPNPC---FPTRSM : 25
TG_MS4A15 : ----- : -
AC_MS4Ax1 : -----MASGTUVFLA : 10
AC_MS4Ax2 : -----MA : 2
DR_17A.15 : -----MS : 2
DR_17A.3 : -----MS : 2
DR_17A.2 : -----MA : 2
DR_17A.5 : ----- : -
DR_17A.1 : ----- : -
DR_17A.12 : -----MS : 2
DR_17A.4 : ----- : -
DR_17A.10 : -----MS : 2
DR_17A.6 : ----- : -
DR_17A.11 : -----MS : 2
DR_17A.7 : ----- : -
DR_17A.8 : -----MS : 2
DR_17A.9 : ----- : -
DR_17A.13 : ----- : -
DR_17A.16 : -----ML : 2
DR_17A.17 : -----MS : 2
DR_17A.14 : -----MS : 2
DR_17B.1 : -----MSS : 3
DR_17B.2 : -----MSS : 3
DR_17C.2 : -----MTGVLVFLFGIVLTTSDYNYPNSSFSVISGLTYWGSFVYISAGLSVAAQNKLHP : 55
DR_17C.1 : -----MKQNTIEFIISFF--ISGCWAKASYNRFHK-----HKQTPE : 34
OM_17C : -----MSS : 3
TN_MS4Ax3 : ----- : -
TN_MS4Ax2 : ----- : -
SA_MS4Ax1 : ----- : -
AT_MS4Ax1 : ----- : -
XT_MS4Ax2 : ----- : -
BT_1 : ----- : -
HS_1 : ----- : -
MM_1 : -----MSGP : 4
MD_1 : ----- : -
MD_15 : -----MT : 2
OA_15 : -----MT : 2
HS_15 : -----MS : 2
BT_15 : -----MS : 2
MM_15 : -----MWERRRGRGESAAAGTAAVASRLRPPGSLNMTS : 31
MM_5 : ----- : -
HS_5 : ----- : -
BT_5 : ----- : -
HS_14 : ----- : -
BT_14 : ----- : -
MM_2 : ----- : -
HS_2 : ----- : -
BT_2 : ----- : -
HS_6A : ----- : -
HS_6E : ----- : -
MM_6D : ----- : -
MM_11 : ----- : -
MM_6B : ----- : -
MM_6C : ----- : -
HS_7 : ----- : -
MM_7 : ----- : -
BT_7 : ----- : -
HS_3 : ----- : -
MM_3 : ----- : -
MM_4B : ----- : -
MM_4C : ----- : -
MM_9 : ----- : -
MM_4D : ----- : -
HS_4E : ----- : -
HS_4A : -----MGAVGE : 6
MM_4x : ----- : -
AC_MS4Ax3 : -----MSSGPMES : 8
BT_TM176B : -----MA : 2
HS_TM176B : -----MT : 2
MM_TM176B : -----MV : 2
OA_TM176B : -----MTDQVSGIP : 9
TN_TM1.3B : ----- : -
HS_TM176A : ----- : -
BT_TM176A : ----- : -
MM_TM176A : -----MS : 2
DR_TMLx : -----MNAIKQKQSHVIFTVDRLRRAIQTCHKSKETGDSAVVTCGKFIPTVYNNP : 50
DR_TML1.2 : -----MS : 2
DR_TML1.3A : MSVTVSHGEGTMIIIVSSNPKSKWMLCQILGSLCYGPVCFVPEMDRETLSSTQRVFGIVQIFAILNMLGCFGLIFSKCDLFPSSNTPGGQCNDVRVLFILQLIVAIISPCAMTAK : 119
TN_TM1.3A : -----MS : 2
DR_TML1.3B : -----MS : 2
BT_12 : ----- : -
TN_MS4Ax1 : ----- : -
XT_MS4Ax1 : ----- : -
TN_MS4Ax4 : ----- : -
SP_out : -----MAEPPVYTPPEQKRTAYPPGGVYPQGGPAAYPQGGPAGYPQGGPVAYPQGGPVAYPQGGP : 60

```

|           |   |                              |     |                  |     |     |     |                               |     |     |     |     |                                             |                            |       |
|-----------|---|------------------------------|-----|------------------|-----|-----|-----|-------------------------------|-----|-----|-----|-----|---------------------------------------------|----------------------------|-------|
|           | 0 | *                            | 140 | *                | 160 | *   | 180 | *                             | 200 | *   | 220 | *   | 2                                           |                            |       |
| MM_10     | : | PTAVPGSVTG                   | --- | EVSRWQLGPA       | --- | --- | --- | QPAQKVAQPONLVFDGHL            | --- | --- | --- | --- | EKALEGSDDLKRC                               | : 58                       |       |
| HS_10     | : | TVIPSRGAR                    | --- | GLPSWQVLSFV      | --- | --- | --- | QPWQTSAPQNTTQPKLLAPHQHD       | --- | --- | --- | --- | KSQKSS--LLKRE                               | : 61                       |       |
| BT_10     | : | RSBEGHPSEKALSPTFFGLDLP       | --- | ---              | --- | --- | --- | QKVTQDLPFFPNWHQ               | --- | --- | --- | --- | EKPKSSSRVLE                                 | : 66                       |       |
| OA_10     | : | RDADSPALIDGTFRRQCEYLTPS      | --- | ---              | --- | --- | --- | QPKWAFQSGQVIALGTPGEN          | --- | --- | --- | --- | ALSNPKRFRSE                                 | : 69                       |       |
| HS_18     | : | QVIGANSVP                    | --- | GIAPDNVHVIQPS    | --- | --- | --- | NPVAGNHLPQSEVTTYPIPSKVIHCDTG  | --- | --- | --- | --- | YGRQYVPTASLOT                               | : 150                      |       |
| BT_18     | : | RVVIONPAE                    | --- | VNATQGPPTALQHP   | --- | --- | --- | LQTPPGEIQYSLQGTDLTQZPG        | --- | --- | --- | --- | GQNPNTCAPGPMYTSNQFQNMPPGSSFTDDEKPKFKEDVET   | : 156                      |       |
| MM_18     | : | QVMIONPAG                    | --- | TTGLQAGPTGLQYS   | --- | --- | --- | AGMAG--VQAPPGVIGYSEVTVSVQIPGG | --- | --- | --- | --- | DPQNPINTVPGPTQTSLSLQNMMSFMTFPEFNPKFKINEEVRT | : 154                      |       |
| MD_8B     | : | SSGPPYND                     | --- | QPIPLYSNQTSIPPYP | --- | --- | --- | NIQPIPPYFNQNPQVHLYPACHSVS     | --- | --- | --- | --- | VLTVNGNS--ASKVRND--GOVFS                    | : 93                       |       |
| HS_8B     | : | SAVPVANSV                    | --- | LVVAPHNGYVPTPG   | --- | --- | --- | IMSHVPLVYNSQPVHVLVPG--NPPS    | --- | --- | --- | --- | LVSNNVQGP--VQAKKE--KRTIC                    | : 73                       |       |
| BT_8B     | : | SAGPMANSV                    | --- | FVVTPNGYVTLVPG   | --- | --- | --- | GVSQVPIYP--NQSQVHVYHG--NPP    | --- | --- | --- | --- | CVSQQP--TERTLKE--KQALG                      | : 68                       |       |
| MM_8A     | : | SPGPMANSV                    | --- | YVVAPPNSYVPGVG   | --- | --- | --- | TVPQMP IYPSNQPVHVIHG--HLPG    | --- | --- | --- | --- | LVPAMTEPP--AQRVLLK--GOVIG                   | : 89                       |       |
| OA_8A     | : | S-KPANNGA                    | --- | MLTTPGNGVT       | --- | --- | --- | IQMGSNVAQGNQVPLYSGNQFG        | --- | --- | --- | --- | VVQLVNSNL--ITGVKREYGOVFS                    | : 67                       |       |
| MM_13     | : | ---                          | --- | ME               | --- | --- | --- | ---                           | --- | --- | --- | --- | ---                                         | CRNPKVSSANITVIC            | : 17  |
| BT_13     | : | ---                          | --- | ---              | --- | --- | --- | ---                           | --- | --- | --- | --- | ---                                         | ---                        |       |
| HS_13     | : | ---                          | --- | ---              | --- | --- | --- | ---                           | --- | --- | --- | --- | ---                                         | ---                        |       |
| HS_12     | : | SINLENQAQ                    | --- | GAORAQPYGITSPG   | --- | --- | --- | IFASSQPGQGNIQMINPSVGT         | --- | --- | --- | --- | ---                                         | AVMNFKEEAKNIC              | : 92  |
| MM_12     | : | PHPPQPLNF                    | --- | LNFRANQYQGVQSVF  | --- | --- | --- | ITSGIFMTOGLRENVPTVNPALGA      | --- | --- | --- | --- | ---                                         | AISNWKDAALAG               | : 87  |
| TG_MS4A15 | : | ---                          | --- | ---              | --- | --- | --- | MOGMSLRLGSRAMVYT              | --- | --- | --- | --- | ---                                         | ATELPGKGNVYIC              | : 30  |
| AC_MS4Ax1 | : | PNGVNQDSQGVGVTVTQPPGMIOYVQVE | --- | ---              | --- | --- | --- | GFQFQSPSRLOQLNRVSP            | --- | --- | --- | --- | ---                                         | MVKFLNVAKVIC               | : 70  |
| AC_MS4Ax2 | : | SGIVVHIPFDGDNAYOAGQGFPGTGTG  | --- | ---              | --- | --- | --- | VQQLGQQGFSPGNPPEQNPFLG        | --- | --- | --- | --- | ---                                         | PLEKLAKVELKVIC             | : 65  |
| DR_17A.15 | : | TVGAMNPST                    | --- | IVLQQLPQTQTA     | --- | --- | --- | TVTSSSVFVRIQHVAGVSP           | --- | --- | --- | --- | ---                                         | LQRTHLFLRQGPKVIC           | : 58  |
| DR_17A.3  | : | TVGAMNPST                    | --- | IVLQQLPQTQTA     | --- | --- | --- | TVTSSSVFVRIQHVAGVSP           | --- | --- | --- | --- | ---                                         | LOGQALFLRQGPKVIC           | : 58  |
| DR_17A.2  | : | TVRAMNPST                    | --- | IVLQQLPQTQTA     | --- | --- | --- | TGTSSSVFVRIQHVAGVSP           | --- | --- | --- | --- | ---                                         | ROGQAFILKQGPKVIC           | : 58  |
| DR_17A.5  | : | ---                          | --- | MNPST            | --- | --- | --- | IVLQQLPQTQTA                  | --- | --- | --- | --- | ---                                         | ROGQAFILKQGPKVIC           | : 52  |
| DR_17A.1  | : | ---                          | --- | MNPST            | --- | --- | --- | IVLQQLPQTQTA                  | --- | --- | --- | --- | ---                                         | LOGQAFILKQGPKVIC           | : 52  |
| DR_17A.12 | : | TVRAMNPST                    | --- | IVLQQLPQTQTA     | --- | --- | --- | TVTSSSVFVRIQHVAGVSP           | --- | --- | --- | --- | ---                                         | LOGQAFILKQGPKVIC           | : 58  |
| DR_17A.4  | : | ---                          | --- | MNPST            | --- | --- | --- | IVLQQLPQTQTA                  | --- | --- | --- | --- | ---                                         | LOGQAFILRQGPKVIC           | : 52  |
| DR_17A.10 | : | TVGAMNPST                    | --- | IVLQQLPQTQTA     | --- | --- | --- | TGTSSSVFVRIQHVAGVSP           | --- | --- | --- | --- | ---                                         | LOGQAFILKQGPKVIC           | : 58  |
| DR_17A.6  | : | ---                          | --- | MNPST            | --- | --- | --- | IVLQQLPQTQTA                  | --- | --- | --- | --- | ---                                         | LOGQAFILKQGPKVIC           | : 55  |
| DR_17A.11 | : | TVGAMNPST                    | --- | IVLQQLPQTQTA     | --- | --- | --- | VTGTSVFPVVIQHVAGVSP           | --- | --- | --- | --- | ---                                         | LOGQAFILKQGPKVIC           | : 61  |
| DR_17A.7  | : | ---                          | --- | MNPST            | --- | --- | --- | IVLQQLPQTQTA                  | --- | --- | --- | --- | ---                                         | HQGLQLFLQGPVVIC            | : 34  |
| DR_17A.8  | : | TVGAMNPST                    | --- | YVYQAQPPPTAPV    | --- | --- | --- | VTATSSSVFVRIQHVAGVSP          | --- | --- | --- | --- | ---                                         | HQGLQLFLKQGPKVIC           | : 61  |
| DR_17A.9  | : | ---                          | --- | MNPSS            | --- | --- | --- | YVYQAQPPPTAPV                 | --- | --- | --- | --- | ---                                         | LLGQAFILKQGPKVIC           | : 55  |
| DR_17A.13 | : | ---                          | --- | MNPSS            | --- | --- | --- | YVYQAQPPPTAPV                 | --- | --- | --- | --- | ---                                         | LLGQAFILKQGPKVIC           | : 55  |
| DR_17A.16 | : | TVKAVDST                     | --- | VVYKLPPTQTA      | --- | --- | --- | VTGTSVFPVVIQHVAGVSP           | --- | --- | --- | --- | ---                                         | IQAFILKQGPKVIC             | : 50  |
| DR_17A.17 | : | TAGAMNPST                    | --- | IVLQQLPQTQTA     | --- | --- | --- | VTGTSVFPVVIQHVAGVSP           | --- | --- | --- | --- | ---                                         | LEGQAFILKQGPKVIC           | : 61  |
| DR_17A.14 | : | TVEAMSSSS                    | --- | YATQLPFRPTAPP    | --- | --- | --- | VTGTSVFPVVIQHVAGVSP           | --- | --- | --- | --- | ---                                         | COGKIAFKVQGPKVIC           | : 61  |
| DR_17B.1  | : | TVMVGSST                     | --- | FIQLQFPAQTP      | --- | --- | --- | AGHANVPSVLSQLAGAPS            | --- | --- | --- | --- | ---                                         | PHGVOAFILKQGPKVIC          | : 61  |
| DR_17B.2  | : | TVMVGSST                     | --- | FIQLQFPAQTP      | --- | --- | --- | AGHANVPSVLSQLAGAPS            | --- | --- | --- | --- | ---                                         | LELKAFLKQGPKVIC            | : 58  |
| DR_17C.2  | : | HHQTFTLT                     | --- | HFVSGE--NLRMSS   | --- | --- | --- | KIISTEKATVVIQNPQLQNTFVSDDDQE  | --- | --- | --- | --- | ---                                         | GRGSYHYMALKEFPKQGPKVIC     | : 129 |
| DR_17C.1  | : | EHQTSTST                     | --- | HFVSGE--NLRMSS   | --- | --- | --- | KIISTEKATVVIQNPQLQNTFVSDDDQE  | --- | --- | --- | --- | ---                                         | TFIQGFKQGPKVIC             | : 102 |
| QM_17C    | : | SVSTTTNGV                    | --- | VVTHVHPAGNG      | --- | --- | --- | LGMAFSPFTCMGRVGVVYS           | --- | --- | --- | --- | ---                                         | SVMERFREGPKVIC             | : 59  |
| TN_MS4Ax3 | : | ---                          | --- | MEAAAAVQNP       | --- | --- | --- | LVAITFGKNDRVK                 | --- | --- | --- | --- | ---                                         | FSKMEPKVIC                 | : 30  |
| TN_MS4Ax2 | : | ---                          | --- | MS               | --- | --- | --- | APAAATQOTVVVTHL               | --- | --- | --- | --- | ---                                         | KYLEAEPAKVIC               | : 36  |
| SA_MS4Ax1 | : | ---                          | --- | MS               | --- | --- | --- | APAAATQOTVVVTHL               | --- | --- | --- | --- | ---                                         | AQKFLKEGPKVIC              | : 49  |
| AT_MS4Ax1 | : | ---                          | --- | MS               | --- | --- | --- | APAAATQOTVVVTHL               | --- | --- | --- | --- | ---                                         | FLQKFLKEGPKVIC             | : 49  |
| XT_MS4Ax2 | : | ---                          | --- | MS               | --- | --- | --- | APAAATQOTVVVTHL               | --- | --- | --- | --- | ---                                         | LPVPQKFLKQGPVIC            | : 53  |
| BT_1      | : | ---                          | --- | MS               | --- | --- | --- | APAAATQOTVVVTHL               | --- | --- | --- | --- | ---                                         | VPRRVVVVVGPT--QSFPMREAKVIC | : 53  |
| HS_1      | : | ---                          | --- | MS               | --- | --- | --- | APAAATQOTVVVTHL               | --- | --- | --- | --- | ---                                         | LFRRMSSLVGPT--QSFPMRESKVIC | : 53  |
| MM_1      | : | ---                          | --- | MS               | --- | --- | --- | APAAATQOTVVVTHL               | --- | --- | --- | --- | ---                                         | QSFPMRESKVIC               | : 46  |
| MD_1      | : | ---                          | --- | MS               | --- | --- | --- | APAAATQOTVVVTHL               | --- | --- | --- | --- | ---                                         | QSFPMRESKVIC               | : 46  |
| MD_15     | : | SAPATNGVF                    | --- | VVPPNNSGIRPG     | --- | --- | --- | PAMLFRILCQSPGTLQFETPLGAQSPG   | --- | --- | --- | --- | ---                                         | ILRRGSQVSPTLQGFVRESKVIC    | : 54  |
| OA_15     | : | SAASDQVF                     | --- | VVPPNNSGIRPG     | --- | --- | --- | PAMLFRILCQSPGTLQFETPLGAQSPG   | --- | --- | --- | --- | ---                                         | ATFFLNGEPKVIC              | : 75  |
| HS_15     | : | SAASDQVF                     | --- | VVPPNNSGIRPG     | --- | --- | --- | PAMLFRILCQSPGTLQFETPLGAQSPG   | --- | --- | --- | --- | ---                                         | ATFFLNGEPKVIC              | : 75  |
| BT_15     | : | TAPSSNGVF                    | --- | VVPPNNSGIRPG     | --- | --- | --- | PAMLFRILCQSPGTLQFETPLGAQSPG   | --- | --- | --- | --- | ---                                         | PPRSASLRP                  | : 75  |
| MM_15     | : | TAPSSNGVF                    | --- | VVPPNNSGIRPG     | --- | --- | --- | PAMLFRILCQSPGTLQFETPLGAQSPG   | --- | --- | --- | --- | ---                                         | PPRSASLRP                  | : 75  |
| MM_15     | : | APPASNGVF                    | --- | VVPPNNSGIRPG     | --- | --- | --- | PAMLFRILCQSPGTLQFETPLGAQSPG   | --- | --- | --- | --- | ---                                         | ATQPPDLRP                  | : 75  |
| MM_5      | : | APPASNGVF                    | --- | VVPPNNSGIRPG     | --- | --- | --- | PAMLFRILCQSPGTLQFETPLGAQSPG   | --- | --- | --- | --- | ---                                         | ATQPPDLRP                  | : 104 |
| MM_5      | : | APPASNGVF                    | --- | VVPPNNSGIRPG     | --- | --- | --- | PAMLFRILCQSPGTLQFETPLGAQSPG   | --- | --- | --- | --- | ---                                         | ATQPPDLRP                  | : 104 |
| HS_5      | : | ---                          | --- | MDSRAHSPV        | --- | --- | --- | FLVFPPEITASEYESTE             | --- | --- | --- | --- | ---                                         | LTATAVNPNQVQKILIRKLEVIC    | : 51  |
| BT_5      | : | ---                          | --- | MDSRAHSPV        | --- | --- | --- | FLVFPPEITASEYESTE             | --- | --- | --- | --- | ---                                         | LSATTFSTQSPQLKFAKMKVIC     | : 51  |
| HS_14     | : | ---                          | --- | MDSRAHSPV        | --- | --- | --- | FLVFPPEITASEYESTE             | --- | --- | --- | --- | ---                                         | ITGTYDSSMPFKLATRMKVIC      | : 51  |
| BT_14     | : | ---                          | --- | MDSRAHSPV        | --- | --- | --- | FLVFPPEITASEYESTE             | --- | --- | --- | --- | ---                                         | ITGTYDSSMPFKLATRMKVIC      | : 51  |
| MM_2      | : | ---                          | --- | MESTSQDRRA       | --- | --- | --- | THVITIKPNETVLT                | --- | --- | --- | --- | ---                                         | AFYPRHSSLLDFKQGPVIC        | : 46  |
| HS_2      | : | ---                          | --- | MESTSQDRRA       | --- | --- | --- | THVITIKPNETVLT                | --- | --- | --- | --- | ---                                         | AFYPRHSSLLDFKQGPVIC        | : 46  |
| MM_2      | : | ---                          | --- | MESTSQDRRA       | --- | --- | --- | THVITIKPNETVLT                | --- | --- | --- | --- | ---                                         | AFYPRHSSLLDFKQGPVIC        | : 46  |
| HS_2      | : | ---                          | --- | MESTSQDRRA       | --- | --- | --- | THVITIKPNETVLT                | --- | --- | --- | --- | ---                                         | AFYPRHSSLLDFKQGPVIC        | : 46  |
| BT_2      | : | ---                          | --- | MESTSQDRRA       | --- | --- | --- | THVITIKPNETVLT                | --- | --- | --- | --- | ---                                         | AFYPRHSSLLDFKQGPVIC        | : 46  |
| HS_6A     | : | ---                          | --- | MESTSQDRRA       | --- | --- | --- | THVITIKPNETVLT                | --- | --- | --- | --- | ---                                         | AFYPRHSSLLDFKQGPVIC        | : 46  |
| HS_6E     | : | ---                          | --- | MESTSQDRRA       | --- | --- | --- | THVITIKPNETVLT                | --- | --- | --- | --- | ---                                         | AFYPRHSSLLDFKQGPVIC        | : 46  |
| MM_6D     | : | ---                          | --- | MESTSQDRRA       | --- | --- | --- | THVITIKPNETVLT                | --- | --- | --- | --- | ---                                         | AFYPRHSSLLDFKQGPVIC        | : 46  |
| MM_11     | : | ---                          | --- | MESTSQDRRA       | --- | --- | --- | THVITIKPNETVLT                | --- | --- | --- | --- | ---                                         | AFYPRHSSLLDFKQGPVIC        | : 46  |
| MM_6B     | : | ---                          | --- | MESTSQDRRA       | --- | --- | --- | THVITIKPNETVLT                | --- | --- | --- | --- | ---                                         | AFYPRHSSLLDFKQGPVIC        | : 46  |
| MM_6C     | : | ---                          | --- | MESTSQDRRA       | --- | --- | --- | THVITIKPNETVLT                | --- | --- | --- | --- | ---                                         | AFYPRHSSLLDFKQGPVIC        | : 46  |
| HS_7      | : | ---                          | --- | MESTSQDRRA       | --- | --- | --- | THVITIKPNETVLT                | --- | --- | --- | --- | ---                                         | AFYPRHSSLLDFKQGPVIC        | : 46  |
| MM_7      | : | ---                          | --- | MESTSQDRRA       | --- | --- | --- | THVITIKPNETVLT                | --- | --- | --- | --- | ---                                         | AFYPRHSSLLDFKQGPVIC        | : 46  |
| BT_7      | : | ---                          | --- | MESTSQDRRA       | --- | --- | --- | THVITIKPNETVLT                | --- | --- | --- | --- | ---                                         | AFYPRHSSLLDFKQGPVIC        | : 46  |
| HS_3      | : | ---                          | --- | MESTSQDRRA       | --- | --- | --- | THVITIKPNETVLT                | --- | --- | --- | --- | ---                                         | AFYPRHSSLLDFKQGPVIC        | : 46  |
| MM_3      | : | ---                          | --- | MESTSQDRRA       | --- | --- | --- | THVITIKPNETVLT                | --- | --- | --- | --- | ---                                         | AFYPRHSSLLDFKQGPVIC        | : 46  |
| MM_4B     | : | ---                          | --- | MESTSQDRRA       | --- | --- | --- | THVITIKPNETVLT                | --- | --- | --- | --- | ---                                         | AFYPRHSSLLDFKQGPVIC        | : 46  |
| MM_4C     | : | ---                          | --- | MESTSQDRRA       | --- | --- | --- | THVITIKPNETVLT                | --- | --- | --- | --- | ---                                         | AFYPRHSSLLDFKQGPVIC        | : 46  |
| MM_9      | : | ---                          | --- | MESTSQDRRA       | --- | --- | --- | THVITIKPNETVLT                | --- | --- | --- | --- | ---                                         | AFYPRHSSLLDFKQGPVIC        | : 46  |
| MM_4D     | : | ---                          | --- | MESTSQDRRA       | --- | --- | --- | THVITIKPNETVLT                | --- | --- | --- | --- | ---                                         | AFYPRHSSLLDFKQGPVIC        | : 46  |
| HS_4E     | : | ---                          | --- | MESTSQDRRA       | --- | --- | --- | THVITIKPNETVLT                | --- | --- | --- | --- | ---                                         | AFYPRHSSLLDFKQGPVIC        | : 46  |
| HS_4A     | : | ---                          | --- | MESTSQDRRA       | --- | --- | --- | THVITIKPNETVLT                | --- | --- | --- | --- | ---                                         | AFYPRHSSLLDFKQGPVIC        | : 46  |
| MM_4x     | : | ---                          | --- | MESTSQDRRA       | --- | --- | --- | THVITIKPNETVLT                | --- | --- | --- | --- | ---                                         | AFYPRHSSLLDFKQGPVIC        | : 46  |
| AC_MS4Ax3 | : | ---                          | --- | MESTSQDRRA       | --- | --- | --- | THVITIKPNETVLT                | --- | --- | --- | --- | ---                                         | AFYPRHSSLLDFKQGPVIC        | : 46  |
| BT_TMI76B | : | ---                          | --- | MESTSQDRRA       | --- | --- | --- | THVITIKPNETVLT                | --- | --- | --- | --- | ---                                         | AFYPRHSSLLDFKQGPVIC        | : 46  |
| HS_TMI76B | : | ---                          | --- | MESTSQDRRA       | --- | --- | --- | THVITIKPNETVLT                | --- | --- | --- | --- | ---                                         | AFYPRHSSLLDFKQGPVIC        | : 46  |
| BT_TMI76B | : | ---                          | --- | MESTSQDRRA       | --- | --- | --- | THVITIKPNETVLT                | --- | --- | --- | --- | ---                                         | AFYPRHSSLLDFKQGPVIC        | : 46  |
| MM_TMI76B | : | ---                          | --- | MESTSQDRRA</     |     |     |     |                               |     |     |     |     |                                             |                            |       |

MM\_10 : GFHTAFAHAFSGYLI-----STVRN-----LHLVVLK-----CWYELWGTVSLFVAAMAAITV-----TPFKTSKVLCLIANVLS-LFCVLGAGFFIAKDLFLEGFPF----- : 150
HS\_10 : AFHTIARLHLVFSGYLIA-----SIVKN-----LHLVVLK-----SWYEPWGAASPHLSIAATMK-----TFSKTYKMLCMTNHLHS-LFCVLSGFLIFSKDLFLESFPE----- : 153
BT\_10 : AMHTIARLHLVFSGYLI-----AAVGN-----LHLVVLK-----CWYEPWGAASPHLSIAATME-----SFKNYKMK-CAVAASHS-FICVLGAGFFIAKDLFLETFFE----- : 157
OA\_10 : IFFHTIARLHLVFSGYLI-----AISQNLHLVALKS-----WYTWESLHSLFSLCSAIVE-----KIPKSKPKCPKVAHSHS-IFCRLSGLFFIPKDLFLENVFP----- : 161
HS\_18 : ADOIIGTHHFSAINPV-----LYYVFF-----VTM-----LSGVLLHGLSLHNSVSSWAA-----KDP-SPCNNSHSHS-ALFAGFAGFFIITDLSLIY----- : 237
BT\_18 : ADOIIGTHHFSAINPV-----LQYRYS-----YSA-----ISGVLVWGGIFPHSSSIAEAE-----KDR-SSCNHSGSGMNVLS-AVLSLGLVLLVDIRNP----- : 243
MM\_18 : ADOIIGTHHFSAINPV-----LYNTQP-----FVVPLLG-----SGLVWGLHGLSLHNSVSLAE-----KNS-NSCNHSGSGMNVLS-SIFSLGTIITIIYLSIYVSEI----- : 248
MD\_8B : ADOIIGTHHFSAINPV-----TSVIGGHISISFWG-----GYPWGGSLSPITSTITLQA-----KPPITSCCKNNSHSGMNVLS-AIFSVAVGVIITIDFINSNGRY----- : 187
HS\_8B : ADOIIGTHHFSAINPV-----TVLVEGLSISFYG-----GPPWGGIWIHSSSIAAE-----NQPYSYGLSGSGLNVLNLS-AICSAVGVIITIDFINSIHPY----- : 166
BT\_8B : ADOIIGTHHFSAINPV-----TVLMGNVTAVSFYG-----GPPWGGIWIHSSSIAE-----KHSRSSCNHSGSGMNVLS-AIFSVMGVIITIDFINSIHPY----- : 161
MM\_8A : ADOIIGTHHFSAINPV-----TNLFSHYTPVLYFG-----GPPWGGIWIHSSSIAE-----TQNSPQCNHSGSGMNVLS-AIFSVMGVIITIDFINSIHPY----- : 182
OA\_8A : ADOIIGTHHFSAINPV-----TEVTVRVLSLAFYG-----APYEWGGSLSPITSTITLQA-----RNP-TIQCNHSGSGMNVLS-AIFSVMGVIITIDFINSIHPY----- : 158
MM\_13 : VDOIIGTHHFSAINPV-----KGVFGTYEPTVYK-----GTSLWG-FAFVHSIAFTHKAA-----KYQ-SRHLCTVSLNHLNLC-IITIIIVASITLIVSHFRS----- : 114
BT\_13 : VDOIIGTHHFSAINPV-----KGVFGTYEPTVYK-----GCSLWG-IFPHSSISIRAT-----WYP-SORCLTCALENLDC-MILAIISMTITIVELSTFKS----- : 93
HS\_13 : VDOIIGTHHFSAINPV-----KGVFGTYEPTVYK-----GTLWLG-IFPHSSISIRAT-----KYP-TRSGISTITINHLNLC-IITIIIVASITLIVSHFRS----- : 93
HS\_12 : VDOIIGTHHFSAINPV-----LISFSRFRVGFSTAST-----IGYVFWGGIWIHSSSIAAE-----KEL-SRCLKSGMNVLS-SILRFVGTIITIDFINSIHPY----- : 190
MM\_12 : VDOIIGTHHFSAINPV-----LISFSRFRVGFSTAST-----IGYVFWGGIWIHSSSIAAE-----KEL-SRCLKSGMNVLS-SILRFVGTIITIDFINSIHPY----- : 190
TG\_MS4A15 : TDOIIGTHHFSAINPV-----TLTNYVTSVFFVG-----EIPBLGGLVWGGIWIHSSSIAE-----KSPTECAKKSQTMVHSHS-ALFALGGLVAVLVDNLNGLYR----- : 122
AC\_MS4A1 : ADOIIGTHHFSAINPV-----FPCIIISIAVVG-----GVVFWGGIWIHSSSIAAE-----KQATTCGKSSGGMNVLS-AIMALTGSLVLLVLDLNLNLS----- : 164
AC\_MS4A2 : ADOIIGTHHFSAINPV-----LWVLCGGLVWGGIWIHSSSIAAE-----KRLTRGRCNCSGMNVLS-AISLIGLITCIILVLDLNLNLS----- : 147
DR\_17A\_15 : TDOIIGTHHFSAINPV-----G-----YEPFFINTG-----VSWASLITIAAGSIAAE-----IAENKINSPPALCNRASGMNVLS-AIAGSIIHSMDLGFGSIIH----- : 151
DR\_17A\_3 : TDOIIGTHHFSAINPV-----G-----FRNYFFLNT-----FWSGLIWIHSSSIAAE-----IAENKINSPPALCNRASGMNVLS-AIAGSIIHSMDLGFGSIIH----- : 149
DR\_17A\_2 : TDOIIGTHHFSAINPV-----I-----YGNVYFFFTG-----VSWASLITIAAGSIAAE-----IAENKINSPPALCNRASGMNVLS-AIAGSIIHSMDLGFGSIIH----- : 151
DR\_17A\_5 : TDOIIGTHHFSAINPV-----S-----YGYVFLFTG-----ASXWGLIWIHSSSIAAE-----IAENKINSPPALCNRASGMNVLS-AIAGSIIHSMDLGFGSIIH----- : 145
DR\_17A\_1 : TDOIIGTHHFSAINPV-----S-----YGYVFLFTG-----ASXWGLIWIHSSSIAAE-----IAENKINSPPALCNRASGMNVLS-AIAGSIIHSMDLGFGSIIH----- : 145
DR\_17A\_12 : TDOIIGTHHFSAINPV-----H-----YGYVFFHTG-----ASXWGLIWIHSSSIAAE-----IAENKINSPPALCNRASGMNVLS-AIAGSIIHSMDLGFGSIIH----- : 151
DR\_17A\_4 : TDOIIGTHHFSAINPV-----G-----YEMFFINTG-----VSWASLITIAAGSIAAE-----IAENKINSPPALCNRASGMNVLS-AIAGSIIHSMDLGFGSIIH----- : 145
DR\_17A\_10 : TDOIIGTHHFSAINPV-----TAIFYTG-----VSWASLITIAAGSIAAE-----IAENKINSPPALCNRASGMNVLS-AIAGSIIHSMDLGFGSIIH----- : 145
DR\_17A\_6 : TDOIIGTHHFSAINPV-----TAFAPFG-----TPGASLITIAAGSIAAE-----IAENKINSPPALCNRASGMNVLS-AIAGSIIHSMDLGFGSIIH----- : 142
DR\_17A\_11 : TDOIIGTHHFSAINPV-----V-----YVDSFVFG-----VSWASLITIAAGSIAAE-----IAENKINSPPALCNRASGMNVLS-AIAGSIIHSMDLGFGSIIH----- : 154
DR\_17A\_7 : ADOIIGTHHFSAINPV-----FAYAAG-----VSGASVIMVIAASIAAE-----IAENKINSPPALCNRASGMNVLS-AIAGSIIHSMDLGFGSIIH----- : 122
DR\_17A\_8 : TDOIIGTHHFSAINPV-----IVFAVGG-----VSWASLITIAAGSIAAE-----IAENKINSPPALCNRASGMNVLS-AIAGSIIHSMDLGFGSIIH----- : 149
DR\_17A\_9 : TDOIIGTHHFSAINPV-----TLFAAG-----VSWASLITIAAGSIAAE-----IAENKINSPPALCNRASGMNVLS-AIAGSIIHSMDLGFGSIIH----- : 143
DR\_17A\_13 : TDOIIGTHHFSAINPV-----V-----FTHSTFAFG-----VSWASLITIAAGSIAAE-----IAENKINSPPALCNRASGMNVLS-AIAGSIIHSMDLGFGSIIH----- : 142
DR\_17A\_16 : NDOIIGTHHFSAINPV-----V-----YAESVFFVFG-----IPVWGLIWIHSSSIAAE-----IAENKINSPPALCNRASGMNVLS-AIAGSIIHSMDLGFGSIIH----- : 154
DR\_17A\_17 : TDOIIGTHHFSAINPV-----I-----DAASVFFVFG-----APVWGLIWIHSSSIAAE-----IAENKINSPPALCNRASGMNVLS-AIAGSIIHSMDLGFGSIIH----- : 154
DR\_17A\_14 : TDOIIGTHHFSAINPV-----V-----YADSAPVFG-----VSWASLITIAAGSIAAE-----IAENKINSPPALCNRASGMNVLS-AIAGSIIHSMDLGFGSIIH----- : 154
DR\_17B\_1 : TDOIIGTHHFSAINPV-----I-----YVNSFFAGL-----CPFGSIVWGGIWIHSSSIAAE-----IAENKINSPPALCNRASGMNVLS-AIAGSIIHSMDLGFGSIIH----- : 151
DR\_17B\_2 : TDOIIGTHHFSAINPV-----I-----YVNSFFAGL-----CPFGSIVWGGIWIHSSSIAAE-----IAENKINSPPALCNRASGMNVLS-AIAGSIIHSMDLGFGSIIH----- : 151
DR\_17C\_2 : TDOIIGTHHFSAINPV-----IDFYRYHDPHLSVAG-----ITVWGLIWIHSSSIAAE-----IAENKINSPPALCNRASGMNVLS-AIAGSIIHSMDLGFGSIIH----- : 224
DR\_17C\_1 : TDOIIGTHHFSAINPV-----FNRY-----QPAVFFSG-----ITVWGLIWIHSSSIAAE-----IAENKINSPPALCNRASGMNVLS-AIAGSIIHSMDLGFGSIIH----- : 146
OM\_17C : TDOIIGTHHFSAINPV-----VG-----ELSLCVSG-----IPVWGLIWIHSSSIAAE-----IAENKINSPPALCNRASGMNVLS-AIAGSIIHSMDLGFGSIIH----- : 146
TN\_MS4A3 : ADOIIGTHHFSAINPV-----QLHVEHTG-----DVALFVILVWGLIWIHSSSIAAE-----RKPFLWKKCVVILHLS-SAAFNTAALGKSKHHPYRDSY----- : 120
TN\_MS4A2 : TDOIIGTHHFSAINPV-----GGLSSWG-----IDVALFVILVWGLIWIHSSSIAAE-----LHLPTIACGMQVIA-CGATLFTNITSMKHPYRDSY----- : 124
SA\_MS4A1 : VDOIIGTHHFSAINPV-----LTVVSDSIG-----LGSPELWGLIWIHSSSIAAE-----NPHIRIQAACATITIS-SFLVGGATYITIDMLTPSCE----- : 138
AT\_MS4A1 : VDOIIGTHHFSAINPV-----VEYPLVAVIS-----GVVFWGGIWIHSSSIAAE-----KRLTDCGKSSGMNVLS-AIAGSIIHSMDLGFGSIIH----- : 140
BT\_MS4A2 : VDOIIGTHHFSAINPV-----IAMSRYHVISG-----SGVFWGGIWIHSSSIAAE-----SKPTLGGKSSGMNVLS-AIAGSIIHSMDLGFGSIIH----- : 149
XT\_1 : ADOIIGTHHFSAINPV-----LHMDVYM-----PICVIT-----VWVWGLIWIHSSSIAAE-----EKNSQSMITGRIMSLIS-LFAISGMIITIDFINSIHPY----- : 145
HS\_1 : ADOIIGTHHFSAINPV-----MIPAGIYA-----PICVIT-----VWVWGLIWIHSSSIAAE-----EKNSRCKGKIMSLIS-LFAISGMIITIDFINSIHPY----- : 145
MM\_1 : ADOIIGTHHFSAINPV-----MPTGVFA-----PICLS-----VWVWGLIWIHSSSIAAE-----EKTRKSKKAKIMSLIS-LFAISGMIITIDFINSIHPY----- : 139
MD\_1 : ADOIIGTHHFSAINPV-----MVPVGPYA-----PVCVA-----VWVWGLIWIHSSSIAAE-----EKTRSCNNTKGMNVLS-LFSSISGLIITIDFINSIHPY----- : 147
MD\_15 : TDOIIGTHHFSAINPV-----MFRRGY-----IGMLFI-----DGGIPEWGGIWIHSSSIAAE-----KYH-SSCNKISGMNVLS-IIASFAATAALMDFGVNWD----- : 167
OA\_15 : TDOIIGTHHFSAINPV-----MFRRGY-----MGMFFI-----GGIPEWGGIWIHSSSIAAE-----KNI-TQCNKSSGMNVLS-IIASFAATAALMDFGVNWD----- : 167
HS\_15 : TDOIIGTHHFSAINPV-----MVRGRH-----VGFIFI-----EGVFWGGIWIHSSSIAAE-----KNI-TSCNRSSTLILS-VMAHFGTALMDFGVNWD----- : 167
BT\_15 : TDOIIGTHHFSAINPV-----MVRGRH-----VGFIFI-----EGVFWGGIWIHSSSIAAE-----KNI-TSCNRSSTLILS-VMAHFGTALMDFGVNWD----- : 167
MM\_15 : TDOIIGTHHFSAINPV-----MVRGRH-----VGFIFI-----EGVFWGGIWIHSSSIAAE-----KNI-TSCNRSSTLILS-VMAHFGTALMDFGVNWD----- : 196
MM\_5 : TDOIIGTHHFSAINPV-----FTLVNYPFR-----PFIFI-----SGVFWGGIWIHSSSIAAE-----KRRTDTIKMSRAMVLS-ALGAAAGIITIDFINSIHPY----- : 148
HS\_5 : TDOIIGTHHFSAINPV-----FTLLKYPFR-----PFIFI-----SGVFWGGIWIHSSSIAAE-----KRRTDTIKMSRAMVLS-ALGAAAGIITIDFINSIHPY----- : 148
BT\_5 : ADOIIGTHHFSAINPV-----FTLEDYPFR-----PFIFI-----SGVFWGGIWIHSSSIAAE-----KRRTDTIKMSRAMVLS-ALGAAAGIITIDFINSIHPY----- : 148
HS\_14 : ADOIIGTHHFSAINPV-----LNYIGFSORLPLVVL-----TGVPWGLIWIHSSSIAAE-----KSKLGGVGTGMVLS-SLVATIGITITIDFINSIHPY----- : 139
BT\_14 : ASOVLALHIAIGSALFA-----LNYIGFSORLPLVVL-----TGVPWGLIWIHSSSIAAE-----KSKLGGVGTGMVLS-SLVATIGITITIDFINSIHPY----- : 139
MM\_2 : ADOIIGTHHFSAINPV-----SVLIVSDDEEVLVLYK-----LGYVWGLIWIHSSSIAAE-----ERKNTLVIRGSGMNVLS-SIAAGTGAALDLNLTNMFVA----- : 151
HS\_2 : VDOIIGTHHFSAINPV-----SVLDISHIEDIPSSFC-----LGYVWGLIWIHSSSIAAE-----ERNATYIRGSGMNVLS-SIAGTGITITIDFINSIHPY----- : 159
BT\_2 : VDOIIGTHHFSAINPV-----AKINSETEKFFSSFK-----AGYVWGLIWIHSSSIAAE-----EKKPSAYIRGSGMNVLS-GVAAGTGAALDLNLTNMFVA----- : 159
HS\_6A : TDOIIGTHHFSAINPV-----SASFNPET-QVSTL-----NSAYEIPFFI-----KRLTRDHSVGSGLS-ALSALGALDLNLTNMFVA----- : 146
MM\_6D : ADOIIGTHHFSAINPV-----SVPSNLHPT-SVFSVLL-----ESGVPVWGLIWIHSSSIAAE-----KMTKPHHSSALSILR-VLSALGALDLNLTNMFVA----- : 146
MM\_11 : ADOIIGTHHFSAINPV-----SVPSNLHPT-SVFSVLL-----ESGVPVWGLIWIHSSSIAAE-----KMTKPHHSSALSILR-VLSALGALDLNLTNMFVA----- : 146
MM\_6B : ADOIIGTHHFSAINPV-----SVPSNLHPT-SVFSVLL-----KSGVPIGALFPHASITVITE-----TKSTKIDSSITLILS-VSFAVGGIITIDFINSIHPY----- : 146
MM\_6C : ADOIIGTHHFSAINPV-----SVPPVYPN-SVFSVLL-----KSGVPIGALFPHASITVITE-----TKSTKIDSSITLILS-VSFAVGGIITIDFINSIHPY----- : 146
HS\_7 : TDOIIGTHHFSAINPV-----FAPYPSHN-PAISTTL-----MSGVPLGALCGITISISG-----KQSTKPPDLSSTLAVS-SVTAAGIITIDFINSIHPY----- : 146
MM\_7 : TDOIIGTHHFSAINPV-----SA-----SYFN-PEVSTL-----ISGLVIGSALGALCGITISISG-----KISTKPPDLSSTLAVS-SVTAAGIITIDFINSIHPY----- : 143
BT\_7 : TDOIIGTHHFSAINPV-----SVNPSQLS-PAISSIL-----MTGVPFGALCGITISISG-----KSNKPPAINLIFSAV-SVAAGVGLIITIDFINSIHPY----- : 147
HS\_3 : ADOIIGTHHFSAINPV-----SLQYPYHFKHFFFTV-----YTGVPWGLIWIHSSSIAAE-----IKPRTVQNSFGMNVLS-ATIALVGTITIDFINSIHPY----- : 150
MM\_3 : ADOIIGTHHFSAINPV-----CLOVSHHFRHFFFTV-----YTGVPWGLIWIHSSSIAAE-----RNPTRMQLNSFGMNVLS-ATIALVGTITIDFINSIHPY----- : 127
MM\_4B : VDOVTHHFSAINPV-----ELPISV-----MLVPLWGANVFSISGSAAG-----VTPKCVASITLITIS-SVLAATAISGVSVAVGSGFP----- : 137
MM\_4 : VDOVTHHFSAINPV-----ANLSS-----EPLISV-----VLMAPWGPVWGLIWIHSSSIAAG-----VPTKSSISITLITIS-SVLAATAISGVSVAVGSGFP----- : 137
MM\_9 : VDOVTHHFSAINPV-----EPLIYA-----VLMAPWGPVWGLIWIHSSSIAAG-----VPTKSSISITLITIS-SVLAATAISGVSVAVGSGFP----- : 137
MM\_4D : ADOIIGTHHFSAINPV-----LNRVS-----ERMSV-----LLAPWGPVWGLIWIHSSSIAAG-----VPTKSSISITLITIS-SVLAATAISGVSVAVGSGFP----- : 137
HS\_4E : VDOIIGTHHFSAINPV-----CVAPSSY-----EHPHIFV-----YVATVWGSVWGLIWIHSSSIAAG-----IRTCKGCGSGKILIS-SVLAAGIITIDFINSIHPY----- : 166
HS\_4A : VDOIIGTHHFSAINPV-----CMASNTY-----GNSPISV-----YIGVWGLIWIHSSSIAAG-----IRTCKGCGSGKILIS-SVLAAGIITIDFINSIHPY----- : 128
MM\_4x : IDOIIGTHHFSAINPV-----IATVSTG-----EIPSSV-----YIGVWGLIWIHSSSIAAG-----IRTCKGCGSGKILIS-SVLAAGIITIDFINSIHPY----- : 143
AC\_MS4A3 : VDOIIGTHHFSAINPV-----AVNHFLTALS-----ITFVWGLIWIHSSSIAAE-----KWNNTKNTSAINLIS-ALMASLGIITIDFINSIHPY----- : 165
BT\_TM176B : VDOIIGTHHFSAINPV-----WIQLRAS-----CALWAGVAAAGVAVH-----KRRGKLSGCVSGLITLIG-IATAVAAVVCVNSFIWQYD----- : 152
HS\_TM176B : VDOIIGTHHFSAINPV-----WTLVRASG-----CAFAGVSVVAVAGVAVH-----KHPGLAGYISLITLIG-FATMAAAVVCVNSFIWQYD----- : 156
MM\_TM176B : VDOIIGTHHFSAINPV-----WTELCAFG-----CAFAGVSVVAVAGVAVH-----KRRGKLSGCVSGLITLIG-IATAVAAVVCVNSFIWQYD----- : 155
OA\_TM176B : VDOIIGTHHFSAINPV-----WMLSSGT-----CAFAPGAVAAAGVAVH-----KRRSRCWGVSLMILIG-ASAKAALVCVNSFIWQYD----- : 164
TN\_TM1\_3B : -----MRDGGFP-----FWFGMLIITLIGLSE-----RPSQPNRILNLTNIGV-FALAAVAVVCVNSFIWQYD----- : 64
HS\_TM176A : VDOIIGTHHFSAINPV-----YTLVTSIG-----AAITGAVAAAGVAVH-----KRGTYWALLRLLTAA-FSTAAIAAKWYNSFADTWLS----- : 145
BT\_TM176A : VDOIIGTHHFSAINPV-----STLANSIG-----APITGAVAAAGVAVH-----KRGTYWALLRLLTAA-FSTAAIAAKWYNSFADTWLS----- : 153
MM\_TM176A : VDOIIGTHHFSAINPV-----WLAIVSEG-----APWFGVAAAGVAVH-----KRGTYWALLRLLTAA-FSTAAIAAKWYNSFADTWLS----- : 153
DR\_TM1x : VDOIIGTHHFSAINPV-----LMCLGYE-----NMPYMG-----CPWIGVWGLIWIHSSSIAAG-----KPPSSITLIGLSE-AGLIAAIVYAKOBSYGHQ----- : 196
DR\_TM1\_2 : TDOIIGTHHFSAINPV-----IDRLWYWN-----NLTCGD-----AVPFGGTAWFLIITLAA-----WPPSSCAFELLNIGV-GALAITVVCVNSFIWQYD----- : 147
DR\_TM1\_3A : IDOIIGTHHFSAINPV-----SSPLIGVWGLIWIHSSSIAAG-----KPPSQVILVFLNIGV-AAMASIVAVVSLDAMGNV----- : 254
DR\_TM1\_3B : TDOIIGTHHFSAINPV-----FLR-----FWLGSVPLMAVITVAV-----RFPDFLTAALVIGV-ALLAMMGLFASASDMAS----- : 130
BT\_12 : ADOIIGTHHFSAINPV-----VLFGEEDVKVIGSVPLLT-----LGYIISWSSPLISGVAIAQ-----KPPTRVYLSAIVMIFSAFAGTITIDFINSIHPY----- : 115
TN\_MS4A1 : -----MGRPLLTDVDMYFG-----SYPWVWGLIWIHSSSIAAE-----AHPKQIVLIVSMYHVL-VIGVIVVYFYRNLNIGVWPI----- : 76
XT\_MS4A1 : ILDOIIGTHHFSAINPV-----AFRRESTLGRTR-----APLWGLIWIHSSSIAAE-----KKNPYNALAAVSVS-CFTLITVYASITIDFINSIHPY----- : 95
TN\_MS4A4 : LFDVLSALINTGEPFP-----KLFV-----LELLGLLWAGSITANE-----RNPRLQOCTSNVAG-LWGLLWAGSITANE----- : 115
SP\_out : IVDIIGTHHFSAINPV-----VFPVYQVG-----YGVWGLIWIHSSSIAAE-----KKNNSVIAVVAALIS-TPHFGMLIYESTVAAVLTVVE----- : 216

```

360      *      380      *      400      *      420      *      440      *      460      *
MM_10   : ----WPIWRPYP----- : 158
HS_10   : ----SPIWRMYP----- : 161
BT_10   : ----FPIWKYP----- : 165
OA_10   : ----LWTLYP----- : 167
HS_18   : ----- : -
BT_18   : ----- : -
MM_18   : ----SP----- : 250
MD_8B   : ----SYFDS----- : 192
HS_8B   : ----AYP----- : 169
BT_8B   : ----IYP----- : 164
MM_8A   : ----IYP----- : 185
OA_8A   : ----- : -
MM_13   : ----- : -
BT_13   : ----- : -
HS_13   : ----- : -
HS_12   : ----QDY----- : 193
MM_12   : ----QDY----- : 188
TG_MS4A15 : ----- : -
AC_MS4Ax1 : ----YSYDHDHYY----- : 173
AC_MS4Ax2 : ----DPDYSHHN----- : 155
DR_17A.15 : ----YWAKPY----- : 157
DR_17A.3 : ----NC-TGS----- : 154
DR_17A.2 : ----YC-RDF----- : 156
DR_17A.5 : ----- : -
DR_17A.1 : ----SC-RDS----- : 150
DR_17A.12 : ----SC----- : 153
DR_17A.4 : ----FCGHPD----- : 151
DR_17A.10 : ----SYCTDT----- : 151
DR_17A.6 : ----YCRDS----- : 148
DR_17A.11 : ----RYCGDSY----- : 161
DR_17A.7 : ----RCRDAH----- : 128
DR_17A.8 : ----HCIDFR----- : 155
DR_17A.9 : ----QCTDFH----- : 149
DR_17A.13 : ----YCRLYN----- : 148
DR_17A.16 : ----YCSGY----- : 159
DR_17A.17 : ----YCSDY----- : 159
DR_17A.14 : ----YCTWHYD----- : 161
DR_17B.1 : ----FFDYSVH----- : 158
DR_17B.2 : ----FWDYSGH----- : 158
DR_17C.2 : ----CNYS----- : 228
DR_17C.1 : ----CDYSY----- : 201
OM_17C   : ----SCYNYG----- : 153
TN_MS4Ax3 : ----HCEHCRLEQHAVQHCFRKTG----- : 142
TN_MS4Ax2 : ----WYSSYEN----- : 131
SA_MS4Ax1 : ----TAS----- : 141
AT_MS4Ax1 : ----SDCSYSN----- : 147
XT_MS4Ax2 : MCVCYELNSTCKG----- : 162
BT_1    : ----FFK----- : 170
HS_1    : ----FLK----- : 170
MM_1    : ----FLK----- : 164
MD_1    : ----FLK----- : 172
MD_15   : ----- : -
OA_15   : ----- : -
HS_15   : ----- : -
BT_15   : ----- : -
MM_15   : ----- : -
MM_5    : ----YSPD----- : 152
HS_5    : ----YSHQ----- : 152
BT_5    : ----YSGE----- : 152
HS_14   : ----QMPSEEEICVFSRILF----- : 219
BT_14   : ----HGSPLEGICVIGRVLYNGILSVLLIISIAELSIAVTIAFRSNCWTSNEIVFFLPSDVTQNSEQPAPEENDQLQVLEEFSSDDSTINAQSVIFGGYAFFKLTLSRSPLVS : 252
MM_2    : ----N----- : 152
HS_2    : ----HIH----- : 162
BT_2    : ----Y----- : 160
HS_6A   : ----LQCELDKNNIPTRSYV----- : 162
HS_6E   : ----- : -
MM_6D   : ----QQCKLAFTQLDT-TQD----- : 161
MM_11   : ----- : -
MM_6B   : ----EQCLOSKELRPT-EYH----- : 161
MM_6C   : ----ROCKOSKELSLI-EHD----- : 161
HS_7    : ----QHCSEMDFLSSLPYS----- : 162
MM_7    : ----PHCNSEKFLSLLSYL----- : 159
BT_7    : ----QQCDSGRDYLSSMPYS----- : 163
HS_3    : ----RSCHSSSE----- : 158
MM_3    : ----KGCQSSP----- : 134
MM_4B   : ----FRYNY----- : 142
MM_4C   : ----FRYNY----- : 142
MM_9    : ----IRONY----- : 142
MM_4D   : ----FRSQP----- : 142
HS_4E   : ----HYCNHDQL----- : 174
HS_4A   : ----PYCNYYGN----- : 136
MM_4x   : ----YYCTYRGS----- : 151
AC_MS4Ax3 : ----KQLISSS----- : 172
BT_TM176B : -FYDISSVCDLVPVPTPSW----- : 171
HS_TM176B : -FLYIDTVCDRSDPVFPPTTG----- : 175
MM_TM176B : IFSTCNPLQSSMD-PG----- : 170
OA_TM176B : -FYYMDSVCESPSPTSWTFR----- : 183
TN_TM1.3B : ----WMCDDH----- : 70
HS_TM176A : ----YNSACR- ISSSSDWN----- : 160
BT_TM176A : ----FYKGICN-VSPS-WRP----- : 167
MM_TM176A : ----LGDDVCC-RDSSYGWST----- : 169
DR_TM1x  : ----YCRSYYIQS----- : 206
DR_TM1.1.2 : ----YCDYY----- : 153
DR_TM1.1.3A : ----SCYENYG----- : 261
TN_TM1.1.3A : ----WICERDY----- : 156
DR_TM1.1.3B : ----- : -
BT_12   : ----EDYVWS----- : 121
TN_MS4Ax1 : ----RHLSFS----- : 82
XT_MS4Ax1 : ----DIFSSPP----- : 102
TN_MS4Ax4 : ----CPLIPTR----- : 122
SP_out  : ----SCYFRYTG----- : 224

```

```

480      *      500      *      520      *      540      *      560      *      580      *
MM_10 : -----EPTTYIQRIQLTFCCTFFEIFSGSTAI : 187
HS_10 : -----NSTVHIQRLELALCCTVDELFPMPFTAV : 190
BT_10 : -----NDTVHIQRVVLALCVTCVVFVPLGLMAI : 194
OA_10 : -----FYLIHQEIEFVMSAELFPAAMVI : 196
HS_18 : -----VTTYKAMSGGTFPALFEPITCVVSH : 265
BT_18 : -----VIDVKISGGTPEVLFEPITCVVSH : 270
MM_18 : -----LMSSMKAAAGSLPFALFEPITCIVASH : 278
MD_8B : -----TSYYYY-----YYYSGVASAMGSAVFLFSGDELVSIFSSH : 230
HS_8B : -----AWGVNPGMAISGVILVFCLEFGLACASSH : 204
BT_8B : -----LYDPP-----SHTWGRVPGMAVSGLLIFCLFEPVHASISAH : 201
MM_8A : -----SYYPY-----QENLGVRTGVASVLLIFCLDELVSASVSSH : 222
OA_8A : -----RYFTE-----QGLNHRSGAVLSTGLMLESLEFSAACVASH : 195
MM_13 : -----VSY-----RNYGQAKLGREVSRVLLCSYFPEFADALYSI : 149
BT_13 : -----VSY-----RNYGQAKLGRQISRVLLSEFYPEVVSALITYSI : 128
HS_13 : -----VSY-----RNYGQAKLGREVSRVLLSEFYPEVVSALITYSI : 128
HS_12 : -----WAVLSGKGSATLMEFSELEFFACATAH : 222
MM_12 : -----WVLSGKGAQVLAESLEFSAAGAMAY : 217
TG_MS4A15 : -----SSFNYSYVLLAAPV----- : 139
AC_MS4Ax1 : -----ECYLGRITLIGSSAVLLFSGTEFPGTITSTAH : 205
AC_MS4Ax2 : -----DMIMIQVYVTRFYFLVFNLEPCHTIVSAH : 187
DR_17A.15 : -----YSYN-----HMNIFLRSISGVLLVFALEFFSISLSLV : 189
DR_17A.3 : -----YCND-----YNSFLVIGVLLVFALEFVFSISLSA : 186
DR_17A.2 : -----YCYN-----YTLLSGINGVLLVFALEFFSISLSLV : 188
DR_17A.5 : -----YS-----YTLLSGISCVLLVFALEFPCISCLFA : 175
DR_17A.1 : -----YCYN-----YRSLFSGISCVLLVFALEFPCISCLSA : 182
DR_17A.12 : -----SLP-----YSCLFSGISCVLLVFALEFPCISCLSA : 184
DR_17A.4 : -----YFYS-----ERTLLSGISGVLLVFALEFPCISLSLV : 182
DR_17A.10 : -----YCY-----HLLTLLSGISGVLLVFALEFPCISLSLV : 183
DR_17A.6 : -----YCYD-----NWSLSGISGVLLVFALEFPCISLSLV : 180
DR_17A.11 : -----YCYN-----YKTLFLGIRGVLLVFALEFFSISLSA : 193
DR_17A.7 : -----CYN-----DWTIFIGISGVLLVFALEFPCISLSLV : 159
DR_17A.8 : -----CYN-----DWTIVLGGKAVFLFESLEFPCISYLSA : 186
DR_17A.9 : -----CYE-----DWTIVLGGKAVFLFESLEFPCISYLSA : 180
DR_17A.13 : -----YCED-----YFNLLSGF-----LLEFSELEFSAIWSA : 177
DR_17A.16 : -----YCGEIE-----R-MYMLTFLSGISGVLLFTLLOFFSVYLCG : 195
DR_17A.17 : -----YCAEME-----L-KYTLTFLGIVNVLFTLLOFFSISLSA : 195
DR_17A.14 : -----SSTDNI-----ERQYRKALFAGESVLLLEALDELVSICLSG : 199
DR_17B.1 : -----YDYO-----FRYLKTLMSGISEGVLLVFALEFPCISLSA : 194
DR_17B.2 : -----YDY-----YRYFYLTLMSGISEGVLLVFALEFPCISLSA : 193
DR_17C.2 : -----GCGM-----LMKNLGLLGNLIVFSILOFISLCSIG : 260
DR_17C.1 : -----GMVG-----ICFPRQGFCLLEFSELOFISLCSIG : 233
QM_17C : -----LCYO-----YMAHQGQSCHEMLLEFSELEFSAIWSA : 185
TN_MS4Ax3 : -----LIEQCKKQCFRKTGL-----IEQCKKLLDGLGLTVELLELHCYTAML : 191
TN_MS4Ax2 : -----FTLHYET-----TCRNQNNQSHLFVEGVNIOVTLIAIAVTLAA : 170
SA_MS4Ax1 : -----THCD-----QLRPLTYATYTFVLELITTEPTIVVSA : 177
AT_MS4Ax1 : -----YNYCVQP-----AFLGMQTGLAVLHLSLEMGALATSA : 184
XT_MS4Ax2 : -----SFYPTVITGMVAVFLTILVLCVSLSTSI : 193
BT_1 : -----NPDENNSQSV-----YCARIRFVLSNFVMMFAFLOKLVAGTVE : 213
HS_1 : -----NPSEKNSPSTQ-----YCYSIQSLFLGLSMLTEAFFOELVAGTVE : 213
MM_1 : -----NSSEKNSPSTQ-----YCNSIQSVFLGLSMLTEAFFOELVAGTVE : 207
MD_1 : -----EPSKQSSPFHQ-----YCLCLKSLYLGLLAVVHETTFONFVACITE : 215
MD_15 : -----VGRGYLAVTIFTEFFHAWIATY : 192
OA_15 : -----VGRGYLAVTIFTEFFHAWIATY : 192
HS_15 : -----VGRGYLAVTIFTEFFHAWIATY : 192
BT_15 : -----VGRGYLAVTIFTEFFHAWIATY : 192
MM_15 : -----VGRGYLAVTIFTEFFHAWIATY : 221
MM_5 : -----GM-----CQGVITLFIGLVMVLESIVLEFLSLSFSSV : 186
HS_5 : -----NS-----CCKAVTLVFLGLLITMLESIVLEFLSLSFSSV : 186
BT_5 : -----VS-----ECHAVTLVFLGLLITMLESIVLEFLSLSFSSV : 186
HS_14 : PQG-----NKGREFVDPDEQKQSLSPKFSSEIEP-----LPPLEIKKPSNMSIQLDSTFKMKDDELQSAIIV-----PSMQMQLKLDQQAASVOPFSPSHALKLEDISP : 317
BT_14 : QHAGRRGNSFNTSSLFMEDERQKYVPQTLISLYGEEVEVKHSPPILEQKSS-----IMMNT-----EPLKDEDLQAAITO-----SPEEKPLLDQQAASKOLEPSPSYKSVHDLPP : 355
MM_2 : -----NCKNVT-----DDGCFVASFTELEVLMLFTLIFACSAVLTIT : 192
HS_2 : -----SCQKFFETK-----CFMASFTEVVMVFLTILHGLSASVSLTI : 201
BT_2 : -----SCEEVFN-----DYCSLACFSTEVVAMVFLTILHGLSASVSLTI : 200
HS_6A : -----SYFYHDSLYTT-----DCYTAKASLAGLTLSDLECTLFPCAVLTAV : 205
HS_6E : -----SYDYH-SPVTM-----DCHRAKASLAGLTLSDLECTLFPCAVLTAV : 140
MM_6D : -----AYHFFSPEPLN-----SCFVAKAALTFQFSLMLESIVLEFLSLSA : 204
MM_11 : -----QWKLAFQEDT-TQD----- : 161
MM_6B : -----YQ-----FLDRN-----ECFAKSVLQAFVSLMLESIVLEFLSLSA : 201
MM_6C : -----YQPFYNSDRS-----ECAVTKSILTGALSVMLISVLEHGLHALLSAM : 204
HS_7 : -----EYYPYIEIK-----DCLLTSVSLTGVLVMLFTVLELHAAVSSV : 204
MM_7 : -----KSHHWKNEDK-----NCLYAVGAMSALGMMLFTVLEVLAGYSSI : 201
BT_7 : -----TYYSYIDVK-----DCLLTSVDLTGVLVMLFTVLELHAAVSSV : 205
HS_3 : -----SPD-----LCNYMGSISNGVSLLELTLBELCVTISTIA : 193
MM_3 : -----SPD-----VCISLGSDDGLVSLMLLTLBELCVTISTIA : 169
MM_4B : -----TITKGLDVLMLINMDEFCIAVSSA : 168
MM_4C : -----TITKGLDVLMLINMDEFCIAVSSA : 168
MM_9 : -----TITKGLDVLMLINMDEFCIAVSSA : 168
MM_4D : -----AIAS-EDVTLTLINMDEFCIAVSSA : 167
HS_4E : -----SS-----NCYMTMSILMGDGMVLLSVLEFPCIAVSSA : 208
HS_4A : -----SN-----NCHGTMSILMGDGMVLLSVLEFPCIAVSSA : 170
MM_4x : -----SE-----GCHMTLSILMGDGMVLLSVLEFPCIAVSSA : 185
AC_MS4Ax3 : -----SHVSIHLAFVALFHLTSDEFCITIVITH : 201
BT_TM176B : Y-----QRRSSYSWEEENCRRYMQLMDLFLGRALDIAICAOVTVSASLG : 220
HS_TM176B : YRWMRRSQENQWKEECRAYMQMLRKLFTAIRALFAVCKVIVSLSLG : 226
MM_TM176B : YGTVRYSDDSDWKTRECVLNMNMNLFACIMTVVCIIEIVSASLG : 221
OA_TM176B : YSQWQSG-SNWRQENCRKNMVLVLFGARGMVAFAVLELLAGSASLG : 233
TN_TM1.3B : YSTETP-----WQKLFQKCEWKTOSTEGLEKCYSLII : 105
HS_TM176A : YSPEEVRRLHCLTSFMDMLKAFRTQAMLLG : 197
BT_TM176A : YTGAPTLSP-----DLERLQCTAYNMLKAFISNAMLG : 203
MM_TM176A : YMPRTPVFEADRALCFTYSMKKTLMSLQAM : 203
DR_TM1x : YESRTPPE-----ESORQVICBYNNLNRKTCGGDIMLHLSVL : 247
DR_TM1.2 : DSSTPSPE-----QRSDRETCKMYETNKITGGDIMHMLSVL : 193
DR_TM1.3A : YSPNNGF-----RGSFNDCLYRNLSKILGGDIMLHLSVL : 301
TN_TM1.3A : YSTESP-----WQKLFEEKREKLELTEWLRCHILLII : 191
DR_TM1.3B : DTTNN-----WNITRALDIAITFLVLOFCVTLSPSV : 163
BT_12 : QLAGMMLQYLFESSVLELHLSVL : 147
TN_MS4Ax1 : TREQFVWQSLDASSGCMVLLCLCT : 110
XT_MS4Ax1 : ARFILGKLVQGANIALIASVSSLCALCIAY : 138
TN_MS4Ax4 : MNYDCPTEVLEAYTWSVLELHLYNGAIFLH : 161
SP_out : YSIDSI-----CEYNRSVGAIFWHTIHALGLWEIFINCVSAA : 262

```

```

600 * 620 * 640 * 660 * 680 * 700 *
MM_10 : ---TAYMRKRLQAEDKDDTFFIPDT---FMELKGL---SLGPPPSYKDVAQ-----GHSSSDTG : 237
HS_10 : ---TAWRGDCPSAKN--DDACLVPNT---PLHLKGL---PVEPPPSYQSVIQ-----GDAQHQH : 239
BT_10 : ---VAYRDARLSAEB--DDLFLVPSD---FLELKEQ-----SMMPF : 227
OA_10 : ---FCTAKSHSDELETSPVDAGE---TPAEVTM---RHVDPPPS-----YEEVV : 238
HS_18 : ---FGCQATCCRQFENVAVIP---TVFSFN---PANTTSPVNAITGPVNAA-----TGPVATNGPVNTI : 324
BT_18 : ---FGCQATCRQFVNRTEVP---TIVIAN---PANITP-----GPFNATYS : 308
MM_18 : ---FGCQAVCAHFNQMTMFP---TIFGGN---TWNITP-----GPGNTIIP : 316
MD_8B : ---AGCQV--VSSQTNQAVAVAIIPV---PGTHGAP---PMGIPO-----PAVNS : 269
HS_8B : ---FGCQL--VCCQSNVSVIY---PNYIAAN---PVIPE-----PVTSP : 239
BT_8B : ---FGCQL--TCYQTNNGVVI---PNVYVTN---PAVIPE-----PENSP : 236
MM_8A : ---FGCQV--ACCHYNNPQVVI---PNVYIAAN---PVIPE-----PPNPI : 257
OA_8A : ---YGLVSGCCGGQVMTII---PNDPTAT---PMMAPD-----PMPSA : 231
MM_13 : ---SSCAYLPLSSIVKSLVRKTRWL---SSLAARW---QMIWLEA-----GNQEETL : 192
BT_13 : ---FGCV-----GLCRK-----KEDAR : 142
HS_13 : ---YSCS-----NLFR-----QNDL : 141
HS_12 : ---FANQANTT--TNMSVLVIT---NMYESN---PVTPAS-----SSAFP : 256
MM_12 : ---FAHQGLR--CNRSPVPAP---AVYVAN---FLMRES-----PSAFP : 251
TG_MS4A15 : -----VEV : 230
AC_MS4Ax1 : ---FGCQACCPSNOQPMVLVPTLS-----GDAAMIP-----EIVYSPAP : 224
AC_MS4Ax2 : ---FGCRATCCSKSDPESVAVVPCIVS-----GDAAMIP-----EIVYSPAP : 224
DR_17A_15 : ---FACKVACCKPK-----HPPAEIP---QQYIQCPQEV-----EPCFQHP : 233
DR_17A_3 : ---FACKATSCCKPKIPVDNPLIQ---HPPAEIP---QQYIQCPQEV-----EPCFQHP : 233
DR_17A_2 : ---FACKVTCCCKPKIHVSNPLIQ---RPPAETP---QQYSQCPQEV-----EPCFQHP : 235
DR_17A_5 : ---FACKVTCCCKPKIPVSNPLIQ---HPPAEMP---QQYIQCPQEV-----EPCFQHP : 222
DR_17A_1 : ---FACKVTCCYYPQIPVSNPLIQ---HPPAEMP---QQYIQCPQEV-----EPCFQHP : 229
DR_17A_12 : ---FGKVTCCYYPQIPVDSNLLIQ---CPQEI-----EPCFQHP : 219
DR_17A_4 : ---FACKATSCCKPKIPVSNPLIQ---HPPAEMP---QQYIQCPQEV-----EPCFQHP : 229
DR_17A_10 : ---FACKVTCCYYPQISVNNPLIQ---HPPAEIP---QQYIQCPQEV-----EPCFQHP : 230
DR_17A_6 : ---FACKVTCCYYPQIPVNNPLIQ---RPPAEMP---QQYIQCPQEV-----EPCFQHP : 227
DR_17A_11 : ---FGKVTCCYYPQISVNNPLIQ---HPPAEMP---QQYIQCPQEV-----EPCFQHP : 240
DR_17A_7 : ---FACKVACCKPKIPVNNPLIQ---HPPAEIP---QQYIQCPQEV-----EPCFQHP : 206
DR_17A_8 : ---FACKVTSCCKPKIPVYRQPLIQ---HPPAEIP---QQYIQCPQEV-----EPCFQHP : 233
DR_17A_9 : ---FACKVACCKPKIPEDRDPLIQ---HPPAEIP---QQYIQCPQEV-----EPCFQHP : 227
DR_17A_13 : ---FGKVTCCNF-----Q--NTSEIPVAS-----NPFQHP : 188
DR_17A_16 : ---FASKFTSCCHP--QVPSISPA---SPQNYF---Q--NTSEIPVAS-----NPFQHP : 239
DR_17A_17 : ---FACKVSCCNPEVQVPTVSVQV---SPRPHV---HGLNTSGIIVS---NHVYQPPAESL : 248
DR_17A_14 : ---FACNADSCCNTQAPTVS---QAVYP---QITTYSEVPLAS---NPLIQHP : 240
DR_17B_1 : ---SACKAT--CCSPQIAVISNPATH-----FAESA : 219
DR_17B_2 : ---SACKAT--CCSPQIAVISNPSIH---RDCLRR---DDGNHRLGKEVV-----FAESA : 219
DR_17C_2 : ---FACKVTCNIDSAVNNALNQAS---RDCLRR---DDGNHRLGKEVV-----DHNPRLG : 308
DR_17C_1 : ---FACKATCRQASAPVIFLP---NAFSAD---FNIPSP-----AAP : 227
OM_17C : ---FACKAVCHSPEQVIVGSHLP---QGGPVP---QTFDIPNTYE-----TLRTPK : 233
TN_MS4Ax3 : ---FGLSALAAGNQASRSRPAFPQ---TRPPPP---AAPPAQVWVVT-----EAVSEVL : 240
TN_MS4Ax2 : ---YCKVANCCAPAKMPVITVQA-----G : 193
SA_MS4Ax1 : ---FVCKSTRCHPHYSSMPTILLDT---SMTEEE----- : 205
AT_MS4Ax1 : ---FGKSVCHAGSQASQPMITVQY-----ANSQD : 211
XT_MS4Ax2 : ---FACKGLCRTSFNEMTVVYVQAT-----MTDHS : 222
BT_1 : ---NEWKKLCSRKANVLLSAGEK---KEQVIEI---KEEVVEQIEVAEQIEISSL---PKNEEIEIIPQEE : 277
HS_1 : ---NEWKRTCSRKSNVLLSAGEK---KEQVIEI---KEEVVGLTETSSQ---PKNEEIEIIPQEE : 271
MM_1 : ---NEWKRMTRKSNVLLSAGEK---NEQTIKM---KEEIEIELSGVSSQ---PKNEEIEIIPQEE : 265
MD_1 : ---NEWQTLCSGQATSVILLSTEERKEQLVLTVVPSQ---PKEEDLETLPQEEKE---PNFPD : 274
MD_15 : ---FGCQATRSNPNRSMVFLP---NAFSTD---FNIPSP-----AATPP : 227
OA_15 : ---FGCQARSNSAPVIFLP---NAFSSD---FGIPGP-----AATPP : 227
HS_15 : ---FGCQATRAQASAPVIFLP---NAFSAD---FNIPSP-----AAP : 227
BT_15 : ---FGCQATRAQAHAPVIFLP---NAFSTD---FNIPSP-----AASP : 227
MM_15 : ---FGCQATRAQNASVIFLP---NAFGTD---FNIPSP-----AVSPP : 256
MM_5 : ---LGCYTEG--RGCC----- : 197
HS_5 : ---LGHSEDCDCEQCC----- : 200
BT_5 : ---MRGTECGDCEWGAEL----- : 204
HS_14 : ---EDLPSQALPVEGLSEQTMPSKS---TSSHVKQ---SSNLTLANDLPPQGISQDTSQDMLSDMLSDQTPSHAMPQDIPSDMLSQALSAHAILPEASTSHI : 424
BT_14 : ---QDLPYQAPRAKTSPEQDLSA---STSHVTE---SHGITSQDKESQGIPLQNT---QSHDMLSDYLPSPDMPAQDLAFQ---RQALPLQAIFFGATSLLS : 444
MM_2 : ---Y-RIGQELESKVP---DDRLYEELN----- : 217
HS_2 : ---C-GAGEELKGNKVP---EDRVYEEELN----- : 226
BT_2 : ---Y-GIGTELEGNIQIP---EDRLYEEVN----- : 225
HS_6A : ---LRWKQAYSDFPGSGLFLPHYSI---GNSGMSS----- : 239
HS_6E : ---LWQKQV----- : 147
MM_6D : ---LWVKQSSAFSGNVIFLSQNSK---NKSVSSS----- : 233
MM_11 : ---AYQFSPPEPLN---SCFVG----- : 233
MM_6B : ---LWVKQSHSNIPGNVMLPHSSN---NDSNMES----- : 230
MM_6C : ---LWLREG----- : 210
HS_7 : ---FWWKQYLSNPPGSSFSSTQSQD----- : 226
MM_7 : ---FWWKQVYSNPKPGTFFLPQSQD----- : 224
BT_7 : ---FWWR-----STVTALRSSS---HE----- : 222
HS_3 : ---MWCNANCCNSREE--ISSPNSV----- : 214
MM_3 : ---MWCLGNVCGLREA--ITSPNSV---ESG---ILPEGSD---SE : 202
MM_4B : ---FGCEASCCNSREVLVLPSPNV---ETVMAPP---MTLQPLL--PSEHQ---GTNVP : 214
MM_4C : ---FGCRASCCNSSEVLVLPSPNPA---VTVMAPP---VTLQPLL--PSEHQ---GKNVP : 214
MM_9 : ---LDVRLAGVLR--GLVLPSPNFA---VTGGPPPGWTASTHWPPH--QETPK---GKRCS : 218
MM_4D : ---FGCRASCCNSSEVLVLPSPNSA---VTVMAPP---MTLQPLL--PSEHQ---GKNVP : 213
HS_4E : ---FGCKVLCSPSEVLLITPSNSH---MAEIASP----- : 238
HS_4A : ---FGKVLCTPGGVVLLIPSHS---MAETASP----- : 201
MM_4x : ---FGCRVMCCNPGGVMIMPNSPT---KAETANP----- : 218
AC_MS4Ax3 : ---FGCRANCTDDTAIVYVPCIN---GENTIP : 229
BT_TM176B : ---VGLQSPQSS--RALQDEEGSE---RNLG---ENSV : 251
HS_TM176B : ---VGLRNLQSS--QPLN--EEGSE---KRLG---ENSV : 256
MM_TM176B : ---LSLRSMYGRSS--QALN--EEESE---RLLD---GHPAP : 251
OA_TM176B : ---LGLRCLCRADNLELAGACPLR---GDVWLSA---PSAPGVLTWSINDTKHMH---SOPQHWTEFRVATNS : 297
TN_TM1_3B : ---LSFMEVVSIVSSVVLGKAFGS---SPGR-----ENRNSD : 138
HS_TM176A : ---VWILLASLTPMLWYCRMFP---TKG---KRD : 225
BT_TM176A : ---VWILLASLTPMLWYCRMFP---RKE---KRD : 231
MM_TM176A : ---LIGTWVLLASLTPVCVTIWK---RPFKA----- : 231
DR_TM1x : ---QLCVASISCVLTKLCKKTE--- : 273
DR_TM1_2 : ---QLCVTISPCVLTGKVLCKKTE--- : 221
DR_TM1_3A : ---QLCVTISPCVLTGKVLCKKSE--- : 329
TN_TM1_3A : ---LSVMELCVSVSSAVLGIKALRN---SSAR-----ENKNSD : 224
DR_TM1_3B : ---LTLKEICEKN-----TVKH : 177
BT_12 : ---C--WIVRALQSEPKKESYTLSESS---VSS--- : 173
TN_MS4Ax1 : ---FARLALKSTRNQIVHVRPSQ---TVELVCTFRGGD---ERIFNSA : 186
XT_MS4Ax1 : ---MGRSLPQCMCYDDITGMDWLH---PEDEQPO--- : 175
TN_MS4Ax4 : ---GFLSLSAIKTLKAT--- : 175
SP_out : ---YCCGGHSCCAKAPINQGTAST---ATTVQYG---QAQP---MTVAA : 300

```



```

      840      *      860      *      880      *      900      *      920      *      940      *
MM_10 : ----- :
HS_10 : ----- :
BT_10 : ----- :
OA_10 : ----- :
HS_18 : ----- :
BT_18 : ----- :
MM_18 : ----- :
MD_8B : ----- :
HS_8B : ----- :
BT_8B : ----- :
MM_8A : ----- :
OA_8A : ----- :
MM_13 : ----- :
BT_13 : ----- :
HS_13 : ----- :
HS_12 : ----- :
MM_12 : ----- :
TG_MS4A15 : ----- :
AC_MS4Ax1 : ----- :
AC_MS4Ax2 : ----- :
DR_17A.15 : ----- :
DR_17A.3 : ----- :
DR_17A.2 : ----- :
DR_17A.5 : ----- :
DR_17A.1 : ----- :
DR_17A.12 : ----- :
DR_17A.4 : ----- :
DR_17A.10 : ----- :
DR_17A.6 : ----- :
DR_17A.11 : ----- :
DR_17A.7 : ----- :
DR_17A.8 : ----- :
DR_17A.9 : ----- :
DR_17A.13 : ----- :
DR_17A.16 : ----- :
DR_17A.17 : ----- :
DR_17A.14 : ----- :
DR_17B.1 : ----- :
DR_17B.2 : ----- :
DR_17C.2 : ----- :
DR_17C.1 : ----- :
OM_17C : ----- :
TN_MS4Ax3 : ----- :
TN_MS4Ax2 : ----- :
SA_MS4Ax1 : ----- :
AT_MS4Ax1 : ----- :
XT_MS4Ax2 : ----- :
BT_1 : ----- :
HS_1 : ----- :
MM_1 : ----- :
MD_1 : ----- :
MD_15 : ----- :
OA_15 : ----- :
HS_15 : ----- :
BT_15 : ----- :
MM_15 : ----- :
MM_5 : ----- :
HS_5 : ----- :
BT_5 : ----- :
HS_14 : -----DWLSPKR-----HSVDKQALNQTKEQLP-----DQQAEDQAKGEQYPEGQSKDGQVKDQ-----TDKEQNS : 597
BT_14 : LQLPDDQQAENLRIQEKKPPRQLYQDMQIQEYHDWQSPDRRQVTWQSLGQQSQEWRTQDWKSEWEKREKREKQLEMQHSQNWDFQAWQTDLQVKESRKQSLFQETQTLHATIPADLDEQS : 682
MM_2 : ----- :
HS_2 : ----- :
BT_2 : ----- :
HS_6A : ----- :
HS_6E : ----- :
MM_6D : ----- :
MM_11 : ----- :
MM_6B : ----- :
MM_6C : ----- :
HS_7 : ----- :
MM_7 : ----- :
BT_7 : ----- :
HS_3 : ----- :
MM_3 : ----- :
MM_4B : ----- :
MM_4C : ----- :
MM_9 : ----- :
MM_4D : ----- :
HS_4E : ----- :
HS_4A : ----- :
MM_4x : ----- :
AC_MS4Ax3 : ----- :
BT_TM176B : ----- :
HS_TM176B : ----- :
MM_TM176B : ----- :
OA_TM176B : ----- :
TN_TM1.3B : ----- :
HS_TM176A : ----- :
BT_TM176A : ----- :
MM_TM176A : ----- :
DR_TM1x : ----- :
DR_TM1.2 : ----- :
DR_TM1.3A : ----- :
TN_TM1.3A : ----- :
DR_TM1.3B : ----- :
BT_12 : ----- :
TN_MS4Ax1 : ----- :
XT_MS4Ax1 : ----- :
TN_MS4Ax4 : ----- :
SP_out : ----- :

```



```

          960      *      980      *      1000      *      1020      *      1040      *      1060      *
MM_10 : ----- : -
HS_10 : ----- : -
BT_10 : ----- : -
OA_10 : ----- : -
HS_18 : ----- : -
BT_18 : ----- : -
MM_18 : ----- : -
MD_8B : ----- : -
HS_8B : ----- : -
BT_8B : ----- : -
MM_8A : ----- : -
OA_8A : ----- : -
MM_13 : ----- : -
BT_13 : ----- : -
HS_13 : ----- : -
HS_12 : ----- : -
MM_12 : ----- : -
TG_MS4A15 : ----- : -
AC_MS4Ax1 : ----- : -
AC_MS4Ax2 : ----- : -
DR_17A.15 : ----- : -
DR_17A.3 : ----- : -
DR_17A.2 : ----- : -
DR_17A.5 : ----- : -
DR_17A.1 : ----- : -
DR_17A.12 : ----- : -
DR_17A.4 : ----- : -
DR_17A.10 : ----- : -
DR_17A.6 : ----- : -
DR_17A.11 : ----- : -
DR_17A.7 : ----- : -
DR_17A.8 : ----- : -
DR_17A.9 : ----- : -
DR_17A.13 : ----- : -
DR_17A.16 : ----- : -
DR_17A.17 : ----- : -
DR_17A.14 : ----- : -
DR_17B.1 : ----- : -
DR_17B.2 : ----- : -
DR_17C.2 : ----- : -
DR_17C.1 : ----- : -
OM_17C : ----- : -
TN_MS4Ax3 : ----- : -
TN_MS4Ax2 : ----- : -
SA_MS4Ax1 : ----- : -
AT_MS4Ax1 : ----- : -
XT_MS4Ax2 : ----- : -
BT_1 : ----- : -
HS_1 : ----- : -
MM_1 : ----- : -
MD_1 : ----- : -
MD_15 : ----- : -
OA_15 : ----- : -
HS_15 : ----- : -
BT_15 : ----- : -
MM_15 : ----- : -
MM_5 : ----- : -
HS_5 : ----- : -
BT_5 : ----- : -
HS_14 : KKQTQDQOTEDQPAQEKKSPKGGFQNVQAEQQQAQVEKVPKLLCQDS-----ESQIQYQFQWQFHKGNLQAGQPRVNLAKNPLTG----- : 679
BT_14 : QDVLQDSQHKNKQDQLQSAGIQKEVMETDAVQTRDIKSEDMSCGKSQTPSDLQSEDAKSDFNCF SYQSSVQELQSTGSKQDMETDAVQTRDIKSEDTSCGKSQSPTDLQLEDIKPDS : 801
MM_2 : ----- : -
HS_2 : ----- : -
BT_2 : ----- : -
HS_6A : ----- : -
HS_6E : ----- : -
MM_6D : ----- : -
MM_11 : ----- : -
MM_6B : ----- : -
MM_6C : ----- : -
HS_7 : ----- : -
MM_7 : ----- : -
BT_7 : ----- : -
HS_3 : ----- : -
MM_3 : ----- : -
MM_4B : ----- : -
MM_4C : ----- : -
MM_9 : ----- : -
MM_4D : ----- : -
HS_4E : ----- : -
HS_4A : ----- : -
MM_4x : ----- : -
AC_MS4Ax3 : ----- : -
BT_TM176B : ----- : -
HS_TM176B : ----- : -
MM_TM176B : ----- : -
OA_TM176B : ----- : -
TN_TML1.3B : ----- : -
HS_TM176A : ----- : -
BT_TM176A : ----- : -
MM_TM176A : ----- : -
DR_TMLx : ----- : -
DR_TML1.2 : ----- : -
DR_TML1.3A : ----- : -
TN_TML1.3A : ----- : -
DR_TML1.3B : ----- : -
BT_12 : ----- : -
TN_MS4Ax1 : ----- : -
XT_MS4Ax1 : ----- : -
TN_MS4Ax4 : ----- : -
SP_out : ----- : -

```

```

1080      *      1100      *      1120      *
MM_10    : ----- : -
HS_10    : ----- : -
BT_10    : ----- : -
OA_10    : ----- : -
HS_18    : ----- : -
BT_18    : ----- : -
MM_18    : ----- : -
MD_8B    : ----- : -
HS_8B    : ----- : -
BT_8B    : ----- : -
MM_8A    : ----- : -
OA_8A    : ----- : -
MM_13    : ----- : -
BT_13    : ----- : -
HS_13    : ----- : -
HS_12    : ----- : -
MM_12    : ----- : -
TG_MS4A15 : ----- : -
AC_MS4Ax1 : ----- : -
AC_MS4Ax2 : ----- : -
DR_17A.15 : ----- : -
DR_17A.3  : ----- : -
DR_17A.2  : ----- : -
DR_17A.5  : ----- : -
DR_17A.1  : ----- : -
DR_17A.12 : ----- : -
DR_17A.4  : ----- : -
DR_17A.10 : ----- : -
DR_17A.6  : ----- : -
DR_17A.11 : ----- : -
DR_17A.7  : ----- : -
DR_17A.8  : ----- : -
DR_17A.9  : ----- : -
DR_17A.13 : ----- : -
DR_17A.16 : ----- : -
DR_17A.17 : ----- : -
DR_17A.14 : ----- : -
DR_17B.1  : ----- : -
DR_17B.2  : ----- : -
DR_17C.2  : ----- : -
DR_17C.1  : ----- : -
OM_17C    : ----- : -
TN_MS4Ax3 : ----- : -
TN_MS4Ax2 : ----- : -
SA_MS4Ax1 : ----- : -
AT_MS4Ax1 : ----- : -
XT_MS4Ax2 : ----- : -
BT_1      : ----- : -
HS_1      : ----- : -
MM_1      : ----- : -
MD_1      : ----- : -
MD_15     : ----- : -
OA_15     : ----- : -
HS_15     : ----- : -
BT_15     : ----- : -
MM_15     : ----- : -
MM_5      : ----- : -
HS_5      : ----- : -
BT_5      : ----- : -
HS_14     : ----- : -
BT_14     : NCSSYQSSVQDITYHAYMSNKNSEQDVKQDTSTCSAVCKEGQSLASTSCGSKEREQSEDLG : 861
MM_2      : ----- : -
HS_2      : ----- : -
BT_2      : ----- : -
HS_6A     : ----- : -
HS_6E     : ----- : -
MM_6D     : ----- : -
MM_11     : ----- : -
MM_6B     : ----- : -
MM_6C     : ----- : -
HS_7      : ----- : -
MM_7      : ----- : -
BT_7      : ----- : -
HS_3      : ----- : -
MM_3      : ----- : -
MM_4B     : ----- : -
MM_4C     : ----- : -
MM_9      : ----- : -
MM_4D     : ----- : -
HS_4E     : ----- : -
HS_4A     : ----- : -
MM_4x     : ----- : -
AC_MS4Ax3 : ----- : -
BT_TM176B : ----- : -
HS_TM176B : ----- : -
MM_TM176B : ----- : -
OA_TM176B : ----- : -
TN_TML1.3B : ----- : -
HS_TM176A : ----- : -
BT_TM176A : ----- : -
MM_TM176A : ----- : -
DR_TMLx   : ----- : -
DR_TML1.2 : ----- : -
DR_TML1.3A : ----- : -
TN_TML1.3A : ----- : -
DR_TML1.3B : ----- : -
BT_12     : ----- : -
TN_MS4Ax1 : ----- : -
XT_MS4Ax1 : ----- : -
TN_MS4Ax4 : ----- : -
SP_out    : ----- : -

```
